# Supplementary material
Source: publisher figshare collection journal article supplement (https://acs.figshare.com/ndownloader/files/5713434)
Supplement: Supplementary file 1 [file 5713434]

# ic990144i.cif

data_Zr3Ni3Sb4 
 
_audit_creation_method            SHELXL-97 
_chemical_name_systematic 
; 
 ? 
; 
_chemical_name_common             'zirconium nickel antimonide'
_chemical_melting_point           ? 
_chemical_formula_moiety          ? 
_chemical_formula_sum 
 'Ni3 Sb4 Zr3' 
_chemical_formula_weight          936.79 
 
loop_ 
 _atom_type_symbol 
 _atom_type_description 
 _atom_type_scat_dispersion_real 
 _atom_type_scat_dispersion_imag 
 _atom_type_scat_source 
 'Ni'  'Ni'   0.3393   1.1124 
 'International Tables Vol C Tables 4.2.6.8 and 6.1.1.4' 
 'Zr'  'Zr'  -2.9673   0.5597 
 'International Tables Vol C Tables 4.2.6.8 and 6.1.1.4' 
 'Sb'  'Sb'  -0.5866   1.5461 
 'International Tables Vol C Tables 4.2.6.8 and 6.1.1.4' 
 
_symmetry_cell_setting            'cubic'
_symmetry_space_group_name_H-M    'I -43d'
 
loop_ 
 _symmetry_equiv_pos_as_xyz 
 'x, y, z' 
 '-x+1/2, -y, z+1/2' 
 '-x, y+1/2, -z+1/2' 
 'x+1/2, -y+1/2, -z' 
 'z, x, y' 
 'z+1/2, -x+1/2, -y' 
 '-z+1/2, -x, y+1/2' 
 '-z, x+1/2, -y+1/2' 
 'y, z, x' 
 '-y, z+1/2, -x+1/2' 
 'y+1/2, -z+1/2, -x' 
 '-y+1/2, -z, x+1/2' 
 'y+1/4, x+1/4, z+1/4' 
 '-y+1/4, -x+3/4, z+3/4' 
 'y+3/4, -x+1/4, -z+3/4' 
 '-y+3/4, x+3/4, -z+1/4' 
 'x+1/4, z+1/4, y+1/4' 
 '-x+3/4, z+3/4, -y+1/4' 
 '-x+1/4, -z+3/4, y+3/4' 
 'x+3/4, -z+1/4, -y+3/4' 
 'z+1/4, y+1/4, x+1/4' 
 'z+3/4, -y+1/4, -x+3/4' 
 '-z+3/4, y+3/4, -x+1/4' 
 '-z+1/4, -y+3/4, x+3/4' 
 'x+1/2, y+1/2, z+1/2' 
 '-x+1, -y+1/2, z+1' 
 '-x+1/2, y+1, -z+1' 
 'x+1, -y+1, -z+1/2' 
 'z+1/2, x+1/2, y+1/2' 
 'z+1, -x+1, -y+1/2' 
 '-z+1, -x+1/2, y+1' 
 '-z+1/2, x+1, -y+1' 
 'y+1/2, z+1/2, x+1/2' 
 '-y+1/2, z+1, -x+1' 
 'y+1, -z+1, -x+1/2' 
 '-y+1, -z+1/2, x+1' 
 'y+3/4, x+3/4, z+3/4' 
 '-y+3/4, -x+5/4, z+5/4' 
 'y+5/4, -x+3/4, -z+5/4' 
 '-y+5/4, x+5/4, -z+3/4' 
 'x+3/4, z+3/4, y+3/4' 
 '-x+5/4, z+5/4, -y+3/4' 
 '-x+3/4, -z+5/4, y+5/4' 
 'x+5/4, -z+3/4, -y+5/4' 
 'z+3/4, y+3/4, x+3/4' 
 'z+5/4, -y+3/4, -x+5/4' 
 '-z+5/4, y+5/4, -x+3/4' 
 '-z+3/4, -y+5/4, x+5/4' 
 
_cell_length_a                    9.0617(6) 
_cell_length_b                    9.0617(6) 
_cell_length_c                    9.0617(6) 
_cell_angle_alpha                 90.00 
_cell_angle_beta                  90.00 
_cell_angle_gamma                 90.00 
_cell_volume                      744.10(9) 
_cell_formula_units_Z             4 
_cell_measurement_temperature     295(2) 
_cell_measurement_reflns_used     24 
_cell_measurement_theta_min       8.4 
_cell_measurement_theta_max       15.8 
 
_exptl_crystal_description        'block' 
_exptl_crystal_colour             'black' 
_exptl_crystal_size_max           0.04 
_exptl_crystal_size_mid           0.03 
_exptl_crystal_size_min           0.02 
_exptl_crystal_density_meas       ? 
_exptl_crystal_density_diffrn     8.362 
_exptl_crystal_density_method     'not measured' 
_exptl_crystal_F_000              1632 
_exptl_absorpt_coefficient_mu     25.588 
_exptl_absorpt_correction_type    'Gaussian face-indexed empirical' 
_exptl_absorpt_correction_T_min   0.605 
_exptl_absorpt_correction_T_max   0.951 
_exptl_absorpt_process_details    ? 
 
_exptl_special_details 
; 
 ? 
; 
 
_diffrn_ambient_temperature       295(2) 
_diffrn_radiation_wavelength      0.71073 
_diffrn_radiation_type            MoK\a 
_diffrn_radiation_source          'fine-focus sealed tube' 
_diffrn_radiation_monochromator   graphite 
_diffrn_measurement_device_type   'Enraf-Nonius CAD4' 
_diffrn_measurement_method        'theta-two theta' 
_diffrn_detector_area_resol_mean  ? 
_diffrn_standards_number          3 
_diffrn_standards_interval_count  ? 
_diffrn_standards_interval_time   7200 
_diffrn_standards_decay_%         ? 
_diffrn_reflns_number             5878 
_diffrn_reflns_av_R_equivalents   0.2458 
_diffrn_reflns_av_sigmaI/netI     0.0625 
_diffrn_reflns_limit_h_min        -14 
_diffrn_reflns_limit_h_max        14 
_diffrn_reflns_limit_k_min        -14 
_diffrn_reflns_limit_k_max        14 
_diffrn_reflns_limit_l_min        -14 
_diffrn_reflns_limit_l_max        14 
_diffrn_reflns_theta_min          5.51 
_diffrn_reflns_theta_max          34.82 
_reflns_number_total              276 
_reflns_number_gt                 251 
_reflns_threshold_expression      >2sigma(I) 
 
_computing_data_collection        'CAD/PC (Enraf-Nonius)' 
_computing_cell_refinement        'CAD/PC (Enraf-Nonius)' 
_computing_data_reduction         'XCAD4' 
_computing_structure_solution     'Siemens SHELXTL 5.1' 
_computing_structure_refinement   'Siemens SHELXTL 5.1' 
_computing_molecular_graphics     'Siemens SHELXTL 5.1'  
_computing_publication_material   'Siemens SHELXTL 5.1'  
 
_refine_special_details 
; 
 Refinement of F^2^ against ALL reflections.  The weighted R-factor wR and 
 goodness of fit S are based on F^2^, conventional R-factors R are based 
 on F, with F set to zero for negative F^2^. The threshold expression of 
 F^2^ > 2sigma(F^2^) is used only for calculating R-factors(gt) etc. and is 
 not relevant to the choice of reflections for refinement.  R-factors based 
 on F^2^ are statistically about twice as large as those based on F, and R- 
 factors based on ALL data will be even larger. 
; 
 
_refine_ls_structure_factor_coef  Fsqd  
_refine_ls_matrix_type            full 
_refine_ls_weighting_scheme       calc  
_refine_ls_weighting_details 
 'calc w=1/[\s^2^(Fo^2^)+(0.0000P)^2^+6.7215P] where P=(Fo^2^+2Fc^2^)/3' 
_atom_sites_solution_primary      direct 
_atom_sites_solution_secondary    difmap 
_atom_sites_solution_hydrogens    geom 
_refine_ls_hydrogen_treatment     mixed 
_refine_ls_extinction_method      SHELXL 
_refine_ls_extinction_coef        0.0167(13) 
_refine_ls_extinction_expression 
 'Fc^*^=kFc[1+0.001xFc^2^\l^3^/sin(2\q)]^-1/4^' 
_refine_ls_abs_structure_details 
 'Flack H D (1983), Acta Cryst. A39, 876-881' 
_refine_ls_abs_structure_Flack    -0.04(8) 
_refine_ls_number_reflns          276 
_refine_ls_number_parameters      9 
_refine_ls_number_restraints      0 
_refine_ls_R_factor_all           0.0338 
_refine_ls_R_factor_gt            0.0273 
_refine_ls_wR_factor_ref          0.0648 
_refine_ls_wR_factor_gt           0.0626 
_refine_ls_goodness_of_fit_ref    1.091 
_refine_ls_restrained_S_all       1.091 
_refine_ls_shift/su_max           0.000 
_refine_ls_shift/su_mean          0.000 
 
loop_ 
 _atom_site_label 
 _atom_site_type_symbol 
 _atom_site_fract_x 
 _atom_site_fract_y 
 _atom_site_fract_z 
 _atom_site_U_iso_or_equiv 
 _atom_site_adp_type 
 _atom_site_occupancy 
 _atom_site_symmetry_multiplicity 
 _atom_site_calc_flag 
 _atom_site_refinement_flags 
 _atom_site_disorder_assembly 
 _atom_site_disorder_group 
Zr Zr 0.3750 0.0000 0.2500 0.0082(3) Uani 1 4 d S . . 
Ni Ni 0.8750 0.0000 0.2500 0.0075(4) Uani 1 4 d S . . 
Sb Sb 0.08207(6) 0.08207(6) 0.08207(6) 0.0067(2) Uani 1 3 d S . . 
 
loop_ 
 _atom_site_aniso_label 
 _atom_site_aniso_U_11 
 _atom_site_aniso_U_22 
 _atom_site_aniso_U_33 
 _atom_site_aniso_U_23 
 _atom_site_aniso_U_13 
 _atom_site_aniso_U_12 
Zr 0.0094(6) 0.0076(4) 0.0076(4) 0.000 0.000 0.000 
Ni 0.0064(8) 0.0080(5) 0.0080(5) 0.000 0.000 0.000 
Sb 0.0067(2) 0.0067(2) 0.0067(2) 0.00056(15) 0.00056(15) 0.00056(15) 
 
_geom_special_details 
; 
 All esds (except the esd in the dihedral angle between two l.s. planes) 
 are estimated using the full covariance matrix.  The cell esds are taken 
 into account individually in the estimation of esds in distances, angles 
 and torsion angles; correlations between esds in cell parameters are only 
 used when they are defined by crystal symmetry.  An approximate (isotropic) 
 treatment of cell esds is used for estimating esds involving l.s. planes. 
; 
 
loop_ 
 _geom_bond_atom_site_label_1 
 _geom_bond_atom_site_label_2 
 _geom_bond_distance 
 _geom_bond_site_symmetry_2 
 _geom_bond_publ_flag 
Zr Ni 2.77457(18) 5_545 ? 
Zr Ni 2.77457(18) 34_545 ? 
Zr Ni 2.77457(18) 30_455 ? 
Zr Ni 2.77457(18) 33_544 ? 
Zr Sb 3.1240(6) 27_544 ? 
Zr Sb 3.1240(6) 39_444 ? 
Zr Sb 3.1240(6) 13 ? 
Zr Sb 3.1240(6) 2 ? 
Zr Sb 3.1488(6) 38_544 ? 
Zr Sb 3.1488(6) . ? 
Zr Sb 3.1488(6) 28_445 ? 
Zr Sb 3.1488(6) 16_545 ? 
Ni Sb 2.5278(3) 16_545 ? 
Ni Sb 2.5278(3) 38_544 ? 
Ni Sb 2.5278(3) 1_655 ? 
Ni Sb 2.5278(3) 28_545 ? 
Ni Zr 2.77457(18) 9_655 ? 
Ni Zr 2.77457(18) 6 ? 
Ni Zr 2.77457(18) 10_645 ? 
Ni Zr 2.77457(19) 29_545 ? 
Sb Ni 2.5278(3) 9_554 ? 
Sb Ni 2.5278(3) 5_545 ? 
Sb Ni 2.5278(3) 1_455 ? 
Sb Zr 3.1240(6) 6_455 ? 
Sb Zr 3.1240(6) 10_545 ? 
Sb Zr 3.1240(6) 2_554 ? 
Sb Zr 3.1488(6) 5 ? 
Sb Zr 3.1488(6) 9 ? 
 
loop_ 
 _geom_angle_atom_site_label_1 
 _geom_angle_atom_site_label_2 
 _geom_angle_atom_site_label_3 
 _geom_angle 
 _geom_angle_site_symmetry_1 
 _geom_angle_site_symmetry_3 
 _geom_angle_publ_flag 
Ni Zr Ni 99.6 5_545 34_545 ? 
Ni Zr Ni 131.8 5_545 30_455 ? 
Ni Zr Ni 99.6 34_545 30_455 ? 
Ni Zr Ni 99.6 5_545 33_544 ? 
Ni Zr Ni 131.8 34_545 33_544 ? 
Ni Zr Ni 99.6 30_455 33_544 ? 
Ni Zr Sb 50.324(2) 5_545 27_544 ? 
Ni Zr Sb 50.324(2) 34_545 27_544 ? 
Ni Zr Sb 137.742(12) 30_455 27_544 ? 
Ni Zr Sb 122.465(13) 33_544 27_544 ? 
Ni Zr Sb 50.323(2) 5_545 39_444 ? 
Ni Zr Sb 137.742(12) 34_545 39_444 ? 
Ni Zr Sb 122.465(13) 30_455 39_444 ? 
Ni Zr Sb 50.324(2) 33_544 39_444 ? 
Sb Zr Sb 90.889(3) 27_544 39_444 ? 
Ni Zr Sb 122.465(13) 5_545 13 ? 
Ni Zr Sb 50.323(2) 34_545 13 ? 
Ni Zr Sb 50.324(2) 30_455 13 ? 
Ni Zr Sb 137.742(12) 33_544 13 ? 
Sb Zr Sb 90.888(3) 27_544 13 ? 
Sb Zr Sb 165.69(2) 39_444 13 ? 
Ni Zr Sb 137.742(12) 5_545 2 ? 
Ni Zr Sb 122.465(13) 34_545 2 ? 
Ni Zr Sb 50.323(2) 30_455 2 ? 
Ni Zr Sb 50.323(2) 33_544 2 ? 
Sb Zr Sb 165.69(2) 27_544 2 ? 
Sb Zr Sb 90.888(3) 39_444 2 ? 
Sb Zr Sb 90.888(3) 13 2 ? 
Ni Zr Sb 137.248(12) 5_545 38_544 ? 
Ni Zr Sb 50.034(12) 34_545 38_544 ? 
Ni Zr Sb 87.364(9) 30_455 38_544 ? 
Ni Zr Sb 87.364(9) 33_544 38_544 ? 
Sb Zr Sb 90.428(19) 27_544 38_544 ? 
Sb Zr Sb 128.808(13) 39_444 38_544 ? 
Sb Zr Sb 65.370(11) 13 38_544 ? 
Sb Zr Sb 77.4 2 38_544 ? 
Ni Zr Sb 50.035(12) 5_545 . ? 
Ni Zr Sb 87.364(9) 34_545 . ? 
Ni Zr Sb 87.364(9) 30_455 . ? 
Ni Zr Sb 137.248(12) 33_544 . ? 
Sb Zr Sb 65.370(11) 27_544 . ? 
Sb Zr Sb 90.428(19) 39_444 . ? 
Sb Zr Sb 77.4 13 . ? 
Sb Zr Sb 128.808(13) 2 . ? 
Sb Zr Sb 135.289(2) 38_544 . ? 
Ni Zr Sb 87.364(9) 5_545 28_445 ? 
Ni Zr Sb 137.248(12) 34_545 28_445 ? 
Ni Zr Sb 50.035(12) 30_455 28_445 ? 
Ni Zr Sb 87.364(9) 33_544 28_445 ? 
Sb Zr Sb 128.808(13) 27_544 28_445 ? 
Sb Zr Sb 77.4 39_444 28_445 ? 
Sb Zr Sb 90.428(19) 13 28_445 ? 
Sb Zr Sb 65.370(11) 2 28_445 ? 
Sb Zr Sb 135.289(2) 38_544 28_445 ? 
Sb Zr Sb 65.082(3) . 28_445 ? 
Ni Zr Sb 87.364(9) 5_545 16_545 ? 
Ni Zr Sb 87.364(9) 34_545 16_545 ? 
Ni Zr Sb 137.248(12) 30_455 16_545 ? 
Ni Zr Sb 50.034(12) 33_544 16_545 ? 
Sb Zr Sb 77.4 27_544 16_545 ? 
Sb Zr Sb 65.370(11) 39_444 16_545 ? 
Sb Zr Sb 128.808(13) 13 16_545 ? 
Sb Zr Sb 90.428(19) 2 16_545 ? 
Sb Zr Sb 65.082(3) 38_544 16_545 ? 
Sb Zr Sb 135.289(2) . 16_545 ? 
Sb Zr Sb 135.289(2) 28_445 16_545 ? 
Sb Ni Sb 84.14(3) 16_545 38_544 ? 
Sb Ni Sb 123.438(15) 16_545 1_655 ? 
Sb Ni Sb 123.438(15) 38_544 1_655 ? 
Sb Ni Sb 123.438(15) 16_545 28_545 ? 
Sb Ni Sb 123.438(15) 38_544 28_545 ? 
Sb Ni Sb 84.14(3) 1_655 28_545 ? 
Sb Ni Zr 156.162(12) 16_545 9_655 ? 
Sb Ni Zr 72.025(13) 38_544 9_655 ? 
Sb Ni Zr 72.69(2) 1_655 9_655 ? 
Sb Ni Zr 72.025(13) 28_545 9_655 ? 
Sb Ni Zr 72.69(2) 16_545 6 ? 
Sb Ni Zr 72.025(13) 38_544 6 ? 
Sb Ni Zr 72.026(13) 1_655 6 ? 
Sb Ni Zr 156.162(12) 28_545 6 ? 
Zr Ni Zr 99.6 9_655 6 ? 
Sb Ni Zr 72.025(13) 16_545 10_645 ? 
Sb Ni Zr 156.162(12) 38_544 10_645 ? 
Sb Ni Zr 72.025(13) 1_655 10_645 ? 
Sb Ni Zr 72.69(2) 28_545 10_645 ? 
Zr Ni Zr 131.8 9_655 10_645 ? 
Zr Ni Zr 99.6 6 10_645 ? 
Sb Ni Zr 72.025(13) 16_545 29_545 ? 
Sb Ni Zr 72.69(2) 38_544 29_545 ? 
Sb Ni Zr 156.162(12) 1_655 29_545 ? 
Sb Ni Zr 72.025(13) 28_545 29_545 ? 
Zr Ni Zr 99.6 9_655 29_545 ? 
Zr Ni Zr 131.8 6 29_545 ? 
Zr Ni Zr 99.6 10_645 29_545 ? 
Ni Sb Ni 113.928(17) 9_554 5_545 ? 
Ni Sb Ni 113.928(17) 9_554 1_455 ? 
Ni Sb Ni 113.928(17) 5_545 1_455 ? 
Ni Sb Zr 57.651(11) 9_554 6_455 ? 
Ni Sb Zr 127.03(3) 5_545 6_455 ? 
Ni Sb Zr 57.651(11) 1_455 6_455 ? 
Ni Sb Zr 127.03(3) 9_554 10_545 ? 
Ni Sb Zr 57.651(11) 5_545 10_545 ? 
Ni Sb Zr 57.651(11) 1_455 10_545 ? 
Zr Sb Zr 85.43(2) 6_455 10_545 ? 
Ni Sb Zr 57.651(11) 9_554 2_554 ? 
Ni Sb Zr 57.651(11) 5_545 2_554 ? 
Ni Sb Zr 127.03(3) 1_455 2_554 ? 
Zr Sb Zr 85.43(2) 6_455 2_554 ? 
Zr Sb Zr 85.43(2) 10_545 2_554 ? 
Ni Sb Zr 138.50(2) 9_554 . ? 
Ni Sb Zr 57.273(7) 5_545 . ? 
Ni Sb Zr 105.388(11) 1_455 . ? 
Zr Sb Zr 163.033(1) 6_455 . ? 
Zr Sb Zr 85.0 10_545 . ? 
Zr Sb Zr 107.7 2_554 . ? 
Ni Sb Zr 57.273(7) 9_554 5 ? 
Ni Sb Zr 105.388(11) 5_545 5 ? 
Ni Sb Zr 138.50(2) 1_455 5 ? 
Zr Sb Zr 107.7 6_455 5 ? 
Zr Sb Zr 163.033(1) 10_545 5 ? 
Zr Sb Zr 85.0 2_554 5 ? 
Zr Sb Zr 84.60(2) . 5 ? 
Ni Sb Zr 105.388(11) 9_554 9 ? 
Ni Sb Zr 138.50(2) 5_545 9 ? 
Ni Sb Zr 57.273(7) 1_455 9 ? 
Zr Sb Zr 85.0 6_455 9 ? 
Zr Sb Zr 107.7 10_545 9 ? 
Zr Sb Zr 163.033(1) 2_554 9 ? 
Zr Sb Zr 84.60(2) . 9 ? 
Zr Sb Zr 84.60(2) 5 9 ? 
 
_diffrn_measured_fraction_theta_max    0.994 
_diffrn_reflns_theta_full              34.82 
_diffrn_measured_fraction_theta_full   0.994 
_refine_diff_density_max    1.276 
_refine_diff_density_min   -1.189 
_refine_diff_density_rms    0.332 
